# Supplementary material for: Longitudinal Dynamics of HPV16 Antibodies in Saliva and Serum among Pregnant Women
Source: MDPI journal article supplement (doi:10.3390/v14112567), 2022-11-20
Supplement: s1 [file s1]

**Table S1. Key demographic characteristics of the participants, not all participants responded to all questions**

|                                                          | <b>Persistent oral HPV16<br/>group (n=13)</b> | <b>Transient oral HPV16<br/>group (n=26)</b> |
|----------------------------------------------------------|-----------------------------------------------|----------------------------------------------|
| <b>Age, mean (range)</b>                                 | 25.3 (18-29)                                  | 27.0 (19-39)                                 |
| <b>Smoking, current</b>                                  |                                               |                                              |
| No smoking                                               | 3                                             | 11                                           |
| 1-10 /day                                                | 5                                             | 7                                            |
| 11-20/day                                                | 3                                             | 6                                            |
| >20/day                                                  | -                                             | 1                                            |
| <b>Alcohol use</b>                                       |                                               |                                              |
| never                                                    | 1                                             | 4                                            |
| 2-3 dose (12g)/week                                      | 1                                             | 3                                            |
| 1 dose/week                                              | 2                                             | 9                                            |
| 1 dose or less/month                                     | 6                                             | 9                                            |
| <b>Mode of delivery (this pregnancy)</b>                 |                                               |                                              |
| alatie                                                   | 10                                            | 17                                           |
| keisarin leikkaus                                        | 3                                             | 9                                            |
| <b>Age of first pregnancy (mean <math>\pm</math>SD)</b>  | 22.8 $\pm$ 3.8                                | 23.3 $\pm$ 3.5                               |
| <b>Number of given births (mean <math>\pm</math> SD)</b> | 1.27 $\pm$ 0.47                               | 0.32 $\pm$ 0.48                              |
| <b>Age at starting oral contraceptives</b>               |                                               |                                              |
| never used                                               | 1                                             | 1                                            |
| 14-16                                                    | 3                                             | 13                                           |
| 17-19                                                    | 6                                             | 9                                            |
| $\geq$ 20                                                | 1                                             | 2                                            |
| <b>Age (years) at first sexual intercourse</b>           |                                               |                                              |
| $\leq$ 16                                                | 6                                             | 17                                           |
| > 16                                                     | 5                                             | 8                                            |
| <b>Practice of oral sex</b>                              |                                               |                                              |
| yes                                                      | 10                                            | 20                                           |
| no                                                       | 1                                             | 5                                            |
| <b>Practise of anal sex</b>                              |                                               |                                              |
| yes                                                      | 3                                             | 5                                            |
| no                                                       | 8                                             | 20                                           |
| <b>Number of sexual intercourse/mo</b>                   |                                               |                                              |
| 2-4                                                      | 5                                             | 13                                           |
| 5-10                                                     | 4                                             | 9                                            |
| >10                                                      | 2                                             | 3                                            |
| <b>Number of lifetime sexual partners</b>                |                                               |                                              |
| 0-2                                                      | 4                                             | 7                                            |
| 3-5                                                      | 3                                             | 4                                            |
| 6-10                                                     | 2                                             | 7                                            |
| >10                                                      | 2                                             | 7                                            |
| <b>History of STDs (genital warts excluded)</b>          |                                               |                                              |
| yes                                                      | 1                                             | 8                                            |
| no                                                       | 12                                            | 18                                           |
| <b>History of genital warts</b>                          |                                               |                                              |
| yes                                                      | 6                                             | 11                                           |
| no                                                       | 5                                             | 14                                           |
